# Supplementary material
Source: publisher figshare collection journal article supplement (https://gsajournals.figshare.com/ndownloader/files/13390358)
Supplement: Supplementary file 1 [file 13390358]

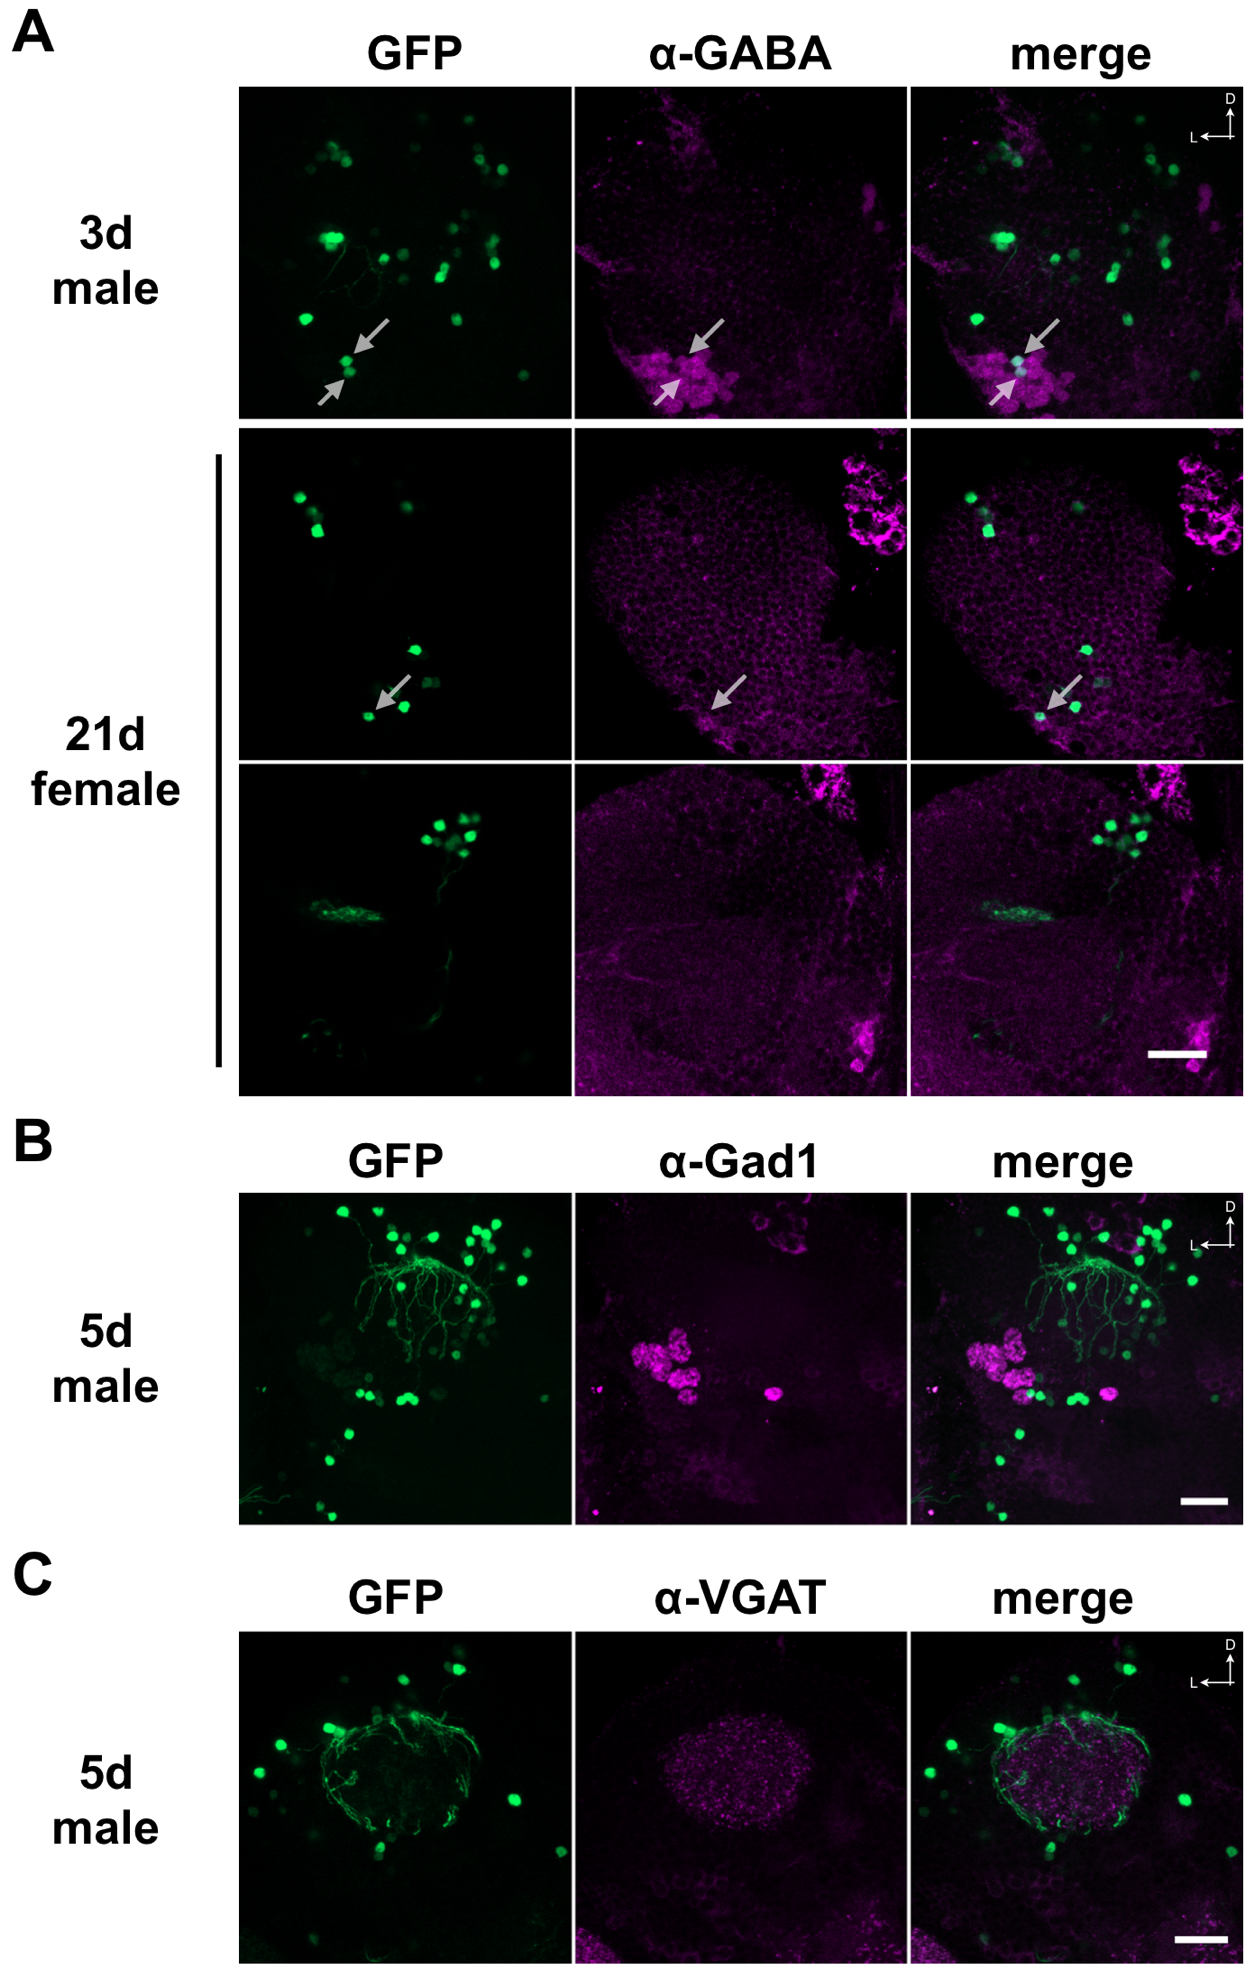


**Figure S4.** Whole mount anti-GABA (A), anti-Gad1 (B), or anti-VGAT (C) immunostaining failed to show signal in the cell bodies of the α/βp KC subtype. Arrows indicate the GFP-positive, GABA-immunoreactive cells outside the MB. Scale bars represent 20 μm. The expression pattern of MB371B was reported by *P{10XUAS-IVS-GFP-p10}attP2*.
